# Supplementary material for: Long-Term Cd Exposure Alters the Metabolite Profile in Stem Tissue of Medicago sativa
Source: MDPI journal article supplement (doi:10.3390/cells9122707), 2020-12-17
Supplement: s1 [file s1]

**Table S1:** Forward (Fwd) and reverse (Rev) primers used to determine gene expression levels via quantitative real-time PCR. The Alfalfa Gene Index and Expression Atlas Database was used to obtain the coding sequences for the genes of interest which are given as contig numbers.

| Gene                                  | Contig ID       | Sequence (5' → 3')                                       | Amplicon length (bp) | Efficiency (%) |
|---------------------------------------|-----------------|----------------------------------------------------------|----------------------|----------------|
| Polyamine synthesis                   |                 |                                                          |                      |                |
| <i>arginine decarboxylase</i>         | 46745           | Fwd: GCTTGAATCTCTTCACGCC<br>Rev: TCCTCCACAACAAACCTATCC   | 114                  | 109            |
| <i>diamine oxidase</i>                | 14769           | Fwd: CTGGTGGTCAGAATGATTGC<br>Rev: ACCCCAAC TTTTATGCTGC   | 89                   | 102            |
| <i>glutamate decarboxylase</i>        | 103359          | Fwd: ATGGATGAATACCCCGTCAC<br>Rev: AACAGTGCCAACACCAACTG   | 114                  | 107            |
| <i>SAM decarboxylase</i>              | 9152            | Fwd: CAAGCAAGTCGTTTGAGCAG<br>Rev: ACAGAACCACCCATTCCAAG   | 94                   | 101            |
| <i>spermidine synthase</i>            | 5341            | Fwd: ACCGACATTACACCAGAC<br>Rev: TCTCCTTCTCCAAACCATTC     | 137                  | 107            |
| <i>spermine synthase</i>              | 92526           | Fwd: TCTTTTATGTCATCCAAACCCC<br>Rev: AATCCACCACCTCCTTGTC  | 134                  | 108            |
| Flavonoide synthesis                  |                 |                                                          |                      |                |
| <i>chalcone isomerase</i>             | 60809           | Fwd: CAAGGCAGTTTCATCAGCAG<br>Rev: AAGCACCCCTCGTTCAACAAC  | 113                  | 108            |
| <i>chalcone reductase</i>             | 59796           | Fwd: TCCTGCTCTTCAAAAATCTCTC<br>Rev: TCCCAAACACCTTTCACATC | 150                  | 108            |
| <i>chalcone synthase</i>              | 99463           | Fwd: ACCTTCATTGGATGCTAGGC<br>Rev: GTGGTGCAAACGATCAAGTG   | 132                  | 108            |
| <i>isoflavone synthase</i>            | 10252           | Fwd: TGCTATGGTTCCTTTGGAC<br>Rev: GATTCTCGGCTCCTCAATG     | 112                  | 102            |
| Glutathione synthesis and redox cycle |                 |                                                          |                      |                |
| <i>homoglutathione synthetase</i>     | Cui et al. 2012 | Fwd: GGCACCAAAAAGATTCAACA<br>Rev: AACTCCACAACCCTGCAAAG   |                      | 122            |
| <i>γ-glutamylcysteine synthetase</i>  | Cui et al. 2012 | Fwd: CATGGAAAGTGGGAGCAATC<br>Rev: AGCAAGAAGCCGAATACACC   |                      | 102            |
| <i>glutathione reductase 1</i>        | Cui et al. 2012 | Fwd: AGGACGGTGAACCTGATTTG<br>Rev: GAATCTAGCAGCACGAACAC   |                      | 99             |

|                                           |                        |                                                            |     |
|-------------------------------------------|------------------------|------------------------------------------------------------|-----|
| <i>glutathione reductase 2</i>            | Cui et al. 2012        | Fwd: TTCCGTTCTCCACAATCTCAT<br>Rev: TTCACTGTCATATCTCCATCCAA | 90  |
| <i>monodehydroascorbate<br/>reductase</i> | Cui et al. 2012        | Fwd: TCAAAGGGCAGGTTGAAGAG<br>Rev: AAGGGAACGTAGCAACATCG     | 102 |
| <i>glutathione synthetase 2</i>           | 10444                  | Fwd: AACGATGGCAGAAGTTGACC<br>Rev: AGCCAGCCCTGAAGTAAATG     | 102 |
| <hr/>                                     |                        |                                                            |     |
| Reference genes                           |                        |                                                            |     |
| <i>cyclophilin</i>                        | Guerriero et al., 2014 | Fwd: CAAACTTTCCTGACGAGTCACC<br>Rev: ACGGTCAGCAATTGCCATTG   | 104 |
| <i>eIF4A</i>                              | Guerriero et al., 2014 | Fwd: TGCTAAGTTGCCTGAAACCG<br>Rev: TGCCCATGTTTTACCTTGC      | 96  |

**Table S2:** Quantitative real-time PCR parameters according to the Minimum Information for publication of Quantitative real-time PCR Experiments (MIQE) guidelines derived from Bustin *et al.* (2009). All procedures were performed according to the manufacturer's protocols.

| <b>Sample/Template</b>                   |                                                                                                                                                                                                                                                                                                                                  |
|------------------------------------------|----------------------------------------------------------------------------------------------------------------------------------------------------------------------------------------------------------------------------------------------------------------------------------------------------------------------------------|
| Source                                   | Stems of <i>Medicago sativa</i> plants cultivated in soil                                                                                                                                                                                                                                                                        |
| Method of preservation                   | Liquid nitrogen                                                                                                                                                                                                                                                                                                                  |
| Storage time                             | 12 month at -80 °C                                                                                                                                                                                                                                                                                                               |
| Handling                                 | Frozen                                                                                                                                                                                                                                                                                                                           |
| Extraction method                        | Phenol-free Total RNA isolation: RNAqueous™ Kit (Life Technologies)                                                                                                                                                                                                                                                              |
| RNA: DNA-free                            | TURBO DNA-free™ Kit (Life Technologies)                                                                                                                                                                                                                                                                                          |
|                                          | Design of intron-spanning primers whenever possible                                                                                                                                                                                                                                                                              |
| Concentration                            | NanoDrop®: ND-1000 Spectrophotometer (Thermo Fischer Scientific)                                                                                                                                                                                                                                                                 |
| <b>Assay optimisation and validation</b> |                                                                                                                                                                                                                                                                                                                                  |
| Accession number                         | Table S1                                                                                                                                                                                                                                                                                                                         |
| Amplicon details                         | Amplicon size: Table S1                                                                                                                                                                                                                                                                                                          |
| Primer sequences                         | Table S1                                                                                                                                                                                                                                                                                                                         |
| <i>In silico</i>                         | Primer design with the Primer3Plus online tool ( <a href="http://www.bioinformatics.nl/cgi-bin/primer3plus/primer3plus.cgi">www.bioinformatics.nl/cgi-bin/primer3plus/primer3plus.cgi</a> ) and primer analysis with OligoAnalyzer 3.1 ( <a href="https://eu.idtdna.com/calc/analyzer">https://eu.idtdna.com/calc/analyzer</a> ) |
| Empirical                                | A primer concentration of 100 nM was used<br>Annealing temperature: 60°C                                                                                                                                                                                                                                                         |
| Priming conditions                       | Combination of oligodT-primers and random hexamers                                                                                                                                                                                                                                                                               |
| PCR efficiency                           | Dilution series (slope, y-intercept and r <sup>2</sup> ; Table S1)                                                                                                                                                                                                                                                               |
| Linear dynamic range                     | Samples are situated within the range of the efficiency curve                                                                                                                                                                                                                                                                    |
| <b>Reverse transcription - PCR</b>       |                                                                                                                                                                                                                                                                                                                                  |
| Protocols                                | As stated in the materials and methods section                                                                                                                                                                                                                                                                                   |
| Reagents                                 | As stated in the materials and methods section                                                                                                                                                                                                                                                                                   |
| No template control (NTC)                | Cq and dissociation curve verification                                                                                                                                                                                                                                                                                           |
| <b>Data analysis</b>                     |                                                                                                                                                                                                                                                                                                                                  |

---

|                           |                                                                                                                                                                                                                                                           |
|---------------------------|-----------------------------------------------------------------------------------------------------------------------------------------------------------------------------------------------------------------------------------------------------------|
| Specialist software       | ViiA7 Real-Time PCR system (Applied Biosystems)<br>qBase <sup>PLUS</sup> software v2.5 (Biogazelle)                                                                                                                                                       |
|                           | Five biological replicates                                                                                                                                                                                                                                |
| Statistical justification | Relative expression of each gene was calculated as an average after elimination of outliers<br>Log transformation of the data<br>Significance of changes in gene expression was determined automatically qBase <sup>PLUS</sup> software v2.5 (Biogazelle) |
| Normalisation             | Two reference genes were selected as described in the materials and methods section                                                                                                                                                                       |

---
